# Supplementary material for: Nonattendance at Scheduled Appointments in Outpatient Clinics Due to COVID-19 and Related Factors in Taiwan: A Health Belief Model Approach
Source: MDPI journal article supplement (doi:10.3390/ijerph18094445), 2021-04-22
Supplement: s1 [file s1]

Supplementary table 1 The result for multicollinearity among variables in Multivariate Logistic Regression Model

|                                                        | Condition<br>Index | Tolerance | VIF   |
|--------------------------------------------------------|--------------------|-----------|-------|
| Age                                                    | 2.658              | 0.894     | 1.119 |
| Heterosexuals <sup>a</sup>                             | 3.052              | 0.894     | 1.119 |
| <i><u>Cognitive constructs of health belief</u></i>    |                    |           |       |
| Perceived high susceptibility to COVID-19 <sup>b</sup> | 3.202              | 0.961     | 1.040 |
| High confidence in coping with COVID-19 <sup>c</sup>   | 3.869              | 0.918     | 1.089 |
| <i><u>Affective construct of health belief</u></i>     |                    |           |       |
| High worry about COVID-19 <sup>d</sup>                 | 5.229              | 0.885     | 1.130 |
| High general anxiety <sup>e</sup>                      | 7.042              | 0.902     | 1.109 |
| <i><u>Behavioral constructs of health belief</u></i>   |                    |           |       |
| Avoiding crowded places                                | 7.485              | 0.814     | 1.229 |
| Washing hands more often                               | 8.537              | 0.725     | 1.379 |
| Wearing a mask more often                              | 16.741             | 0.721     | 1.387 |
